# Supplementary material
Source: Springer Nature journal article supplement (https://www.springermedizin.de/resource/supplementary/13024_2012_361_MOESM3_ESM.pdf/9643816)

**A**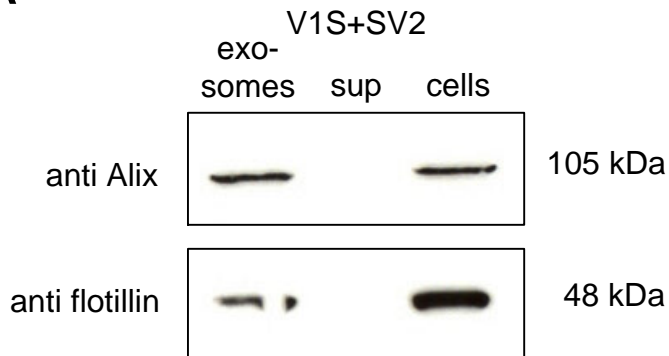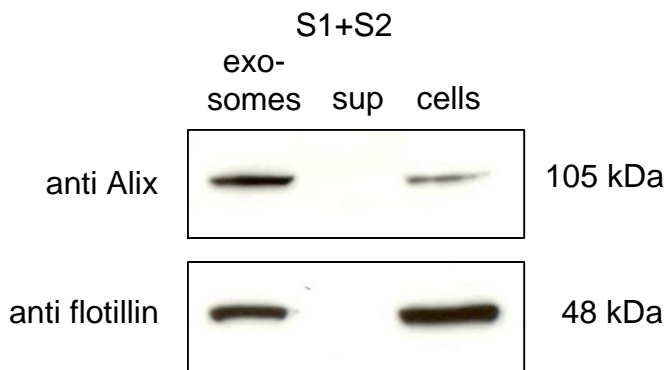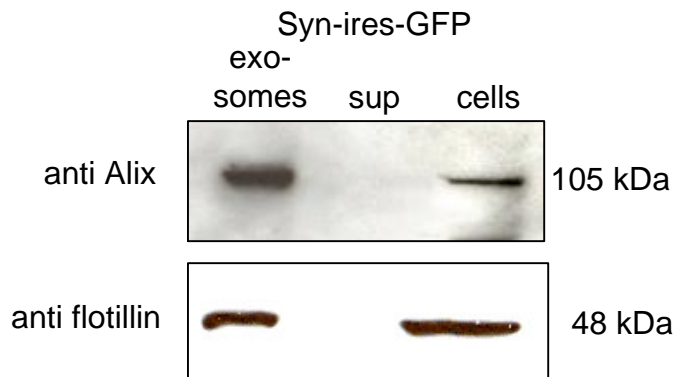**B**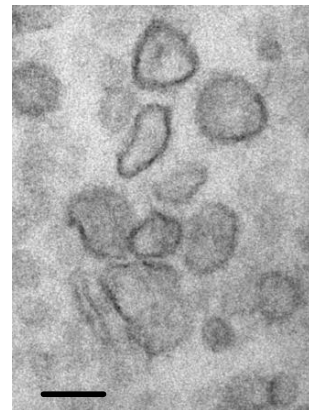**C**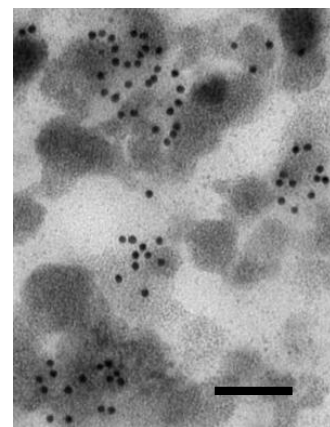

Supplement: MOESM3 [file 9643816]
